# Supplementary material for: Cross-reactive, self-encoded polymer film arrays for sensor applications
Source: Royal Society of Chemistry journal article supplement (doi:10.1039/c6ra13874h), 2016-01-01
Supplement: c6ra13874h1.pdf [file c6ra13874h1.pdf]

*Supporting Information for:*

# Cross-Reactive, Self-encoded Polymer Film Arrays for Sensor Applications

*Jessica E. Fitzgerald,<sup>#</sup> Jintao Zhu,<sup>\$</sup> Juan-Pablo Bravo-Vasquez,<sup>\$</sup> Hicham Fenniri<sup>#,\*</sup>*

<sup>#</sup>Department of Chemical Engineering, Northeastern University, 313 Snell Engineering Research Center, 360 Huntington Avenue, Boston, MA 02115. <sup>\$</sup>Department of Chemistry and National Institute for Nanotechnology, University of Alberta, 11421 Saskatchewan Drive, Edmonton, Alberta T6G 2M9, Canada

h.fenniri@neu.edu, Tel: (617) 373-7690, Fax: (617) 373-2209

TITLE RUNNING HEAD: Self-encoded polymer film sensor arrays

## **Present Addresses**

Professor Jintao Zhu, School of Chemistry and Chemical Engineering, Huazhong University of Science and Technology, 1037 Luoyu Road, Wuhan, China. jtzhu@mail.hust.edu.cn

Dr. Juan-Pablo Bravo-Vasquez, Pureleau Inc., 101-9865 West Saanich Road, North Saanich, British Columbia V8L 5Y8, Canada. juanb@pureleau.ca

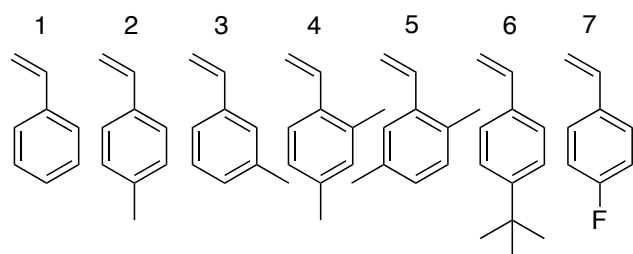

**Figure S1.** Molecular structure of seven different monomers used for the fabrication of the barcoded copolymers. Monomer 7 is present in all the polymers.

**Table S1.** Each of the 64 polymers synthesized is composed of the monomers listed. The ratios of each monomer within each polymer are given in Table S2.

|   | <b>1</b> | <b>2</b> | <b>3</b> | <b>4</b> | <b>5</b> | <b>6</b> | <b>7</b> | <b>8</b> |
|---|----------|----------|----------|----------|----------|----------|----------|----------|
| A | 1        | 2        | 3        | 4        | 5        | 7        | 12       | 13       |
| B | 14       | 15       | 16       | 23       | 24       | 25       | 26       | 34       |
| C | 35       | 36       | 45       | 46       | 56       | 123      | 124      | 125      |
| D | 126      | 134      | 135      | 136      | 145      | 146      | 156      | 234      |
| E | 235      | 236      | 245      | 246      | 256      | 345      | 346      | 356      |
| F | 456      | 3456     | 2456     | 2356     | 2346     | 2345     | 1456     | 1356     |
| G | 1346     | 1345     | 1256     | 1246     | 1245     | 1236     | 1235     | 1234     |
| H | 23456    | 13456    | 12456    | 12356    | 12346    | 12345    | 123456   |          |

**Note:** All the copolymers include ca. 10% w/w of monomer 7. If more than one monomer was present in a given copolymer, their content is equally weighted. For example, a polymer containing 2 monomers in addition to monomer 7, will be composed of 45% w/w of each of the two styrene monomers and 10% of monomer 7.

**Table S2.** Weight percent composition of the polymers

| Reference | Polymer | 1    | 2    | 3    | 4    | 5    | 6    | 7    | Total |
|-----------|---------|------|------|------|------|------|------|------|-------|
| 1         | A1      | 89.1 | 0    | 0    | 0    | 0    | 0    | 0    | 100   |
| 2         | A2      | 0    | 0    | 89   | 0    | 0    | 0    | 11   | 100   |
| 3         | A3      | 0    | 0    | 0    | 0    | 0    | 89   | 11   | 100   |
| 4         | A4      | 0    | 0    | 0    | 89.1 | 0    | 0    | 10.9 | 100   |
| 5         | A5      | 0    | 89.1 | 0    | 0    | 0    | 0    | 10.9 | 100   |
| 6         | A6      | 0    | 0    | 0    | 0    | 88.7 | 0    | 11.3 | 100   |
| 7         | A7      | 44.8 | 0    | 44.2 | 0    | 0    | 0    | 10.9 | 100   |
| 8         | A8      | 44.8 | 0    | 0    | 0    | 0    | 44.2 | 10.9 | 100   |
| 9         | B1      | 44.6 | 0    | 0    | 44.5 | 0    | 0    | 10.9 | 100   |
| 10        | B2      | 44.7 | 44.4 | 0    | 0    | 0    | 0    | 10.9 | 100   |
| 11        | B3      | 45.3 | 0    | 0    | 0    | 43.6 | 0    | 11.1 | 100   |
| 12        | B4      | 0    | 0    | 44.5 | 0    | 0    | 44.5 | 11.1 | 100   |
| 13        | B5      | 0    | 0    | 44.3 | 44.7 | 0    | 0    | 11   | 100   |
| 14        | B6      | 0    | 44.7 | 44.3 | 0    | 0    | 0    | 11   | 100   |
| 15        | B7      | 0    | 0    | 45   | 0    | 43.9 | 0    | 11.1 | 100   |
| 16        | B8      | 0    | 0    | 0    | 44.7 | 0    | 44.3 | 11   | 100   |
| 17        | C1      | 0    | 44.7 | 0    | 0    | 0    | 44.3 | 11   | 100   |
| 18        | C2      | 0    | 0    | 0    | 0    | 43.9 | 45   | 11.1 | 100   |
| 19        | C3      | 0    | 44.5 | 0    | 0    | 44.6 | 0    | 11.1 | 100   |
| 20        | C4      | 0    | 0    | 0    | 45.2 | 43.7 | 0    | 11.1 | 100   |
| 21        | C5      | 0    | 45.2 | 0    | 0    | 43.7 | 0    | 11   | 100   |
| 22        | C6      | 26.9 | 0    | 29.5 | 0    | 0    | 29.5 | 11   | 100   |
| 23        | C7      | 29.9 | 0    | 29.5 | 29.8 | 0    | 0    | 10.9 | 100   |
| 24        | C8      | 29.9 | 29.7 | 29.5 | 0    | 0    | 0    | 10.9 | 100   |
| 25        | D1      | 30.2 | 0    | 29.8 | 0    | 29   | 0    | 11   | 100   |
| 26        | D2      | 29.9 | 0    | 0    | 29.8 | 0    | 29.5 | 10.9 | 100   |
| 27        | D3      | 29.9 | 29.7 | 0    | 0    | 0    | 29.5 | 10.9 | 100   |
| 28        | D4      | 30.2 | 0    | 0    | 0    | 29   | 29.8 | 11   | 100   |
| 29        | D5      | 29.8 | 29.6 | 0    | 29.7 | 0    | 0    | 10.9 | 100   |
| 30        | D6      | 30.1 | 0    | 0    | 30   | 28.9 | 0    | 11   | 100   |
| 31        | D7      | 30.1 | 29.9 | 0    | 0    | 29   | 0    | 11   | 100   |
| 32        | D8      | 0    | 0    | 29.6 | 29.9 | 0    | 29.6 | 11   | 100   |
| 33        | E1      | 0    | 29.8 | 29.6 | 0    | 0    | 29.6 | 11   | 100   |
| 34        | E2      | 0    | 0    | 29.9 | 0    | 29.1 | 29.9 | 11.1 | 100   |
| 35        | E3      | 0    | 29.7 | 29.6 | 29.8 | 0    | 0    | 10.9 | 100   |
| 36        | E4      | 0    | 0    | 29.8 | 30.1 | 29.1 | 0    | 11.1 | 100   |

|    |    |      |      |      |      |      |      |      |     |
|----|----|------|------|------|------|------|------|------|-----|
| 37 | E5 | 0    | 30   | 29.8 | 0    | 29.1 | 0    | 11.1 | 100 |
| 38 | E6 | 0    | 29.7 | 0    | 29.8 | 0    | 29.6 | 10.9 | 100 |
| 39 | E7 | 0    | 0    | 0    | 30.1 | 29.1 | 29.9 | 11.1 | 100 |
| 40 | E8 | 0    | 30   | 0    | 0    | 29.1 | 29.8 | 11.1 | 100 |
| 41 | F1 | 0    | 30   | 0    | 30   | 29   | 0    | 11   | 100 |
| 42 | F2 | 0    | 22.5 | 0    | 22.5 | 21.7 | 22.3 | 11   | 100 |
| 43 | F3 | 0    | 22.5 | 22.3 | 22.5 | 21.7 | 0    | 11   | 100 |
| 44 | F4 | 0    | 22.5 | 22.3 | 0    | 21.8 | 22.3 | 11   | 100 |
| 45 | F5 | 0    | 0    | 22.3 | 22.5 | 21.8 | 22.3 | 11   | 100 |
| 46 | F6 | 0    | 22.3 | 22.2 | 22.4 | 21.7 | 0    | 11   | 100 |
| 47 | F7 | 22.5 | 22.4 | 0    | 22.4 | 21.7 | 0    | 11   | 100 |
| 48 | F8 | 22.6 | 22.4 | 0    | 0    | 21.7 | 22.3 | 11   | 100 |
| 49 | G1 | 22.6 | 0    | 0    | 22.5 | 21.7 | 22.3 | 11   | 100 |
| 50 | G2 | 22.4 | 22.3 | 0    | 22.3 | 0    | 21.1 | 10.9 | 100 |
| 51 | G3 | 22.6 | 22.4 | 22.3 | 0    | 21.7 | 0    | 11   | 100 |
| 52 | G4 | 22.6 | 0    | 22.3 | 22.5 | 21.7 | 0    | 11   | 100 |
| 53 | G5 | 22.4 | 22.3 | 22.1 | 22.3 | 0    | 0    | 10.9 | 100 |
| 54 | G6 | 22.6 | 0    | 22.3 | 0    | 21.8 | 22.3 | 11   | 100 |
| 55 | G7 | 22.4 | 22.3 | 22.1 | 0    | 0    | 22.1 | 11   | 100 |
| 56 | G8 | 22.4 | 0    | 22.1 | 22.4 | 0    | 22.1 | 10.9 | 100 |
| 57 | H1 | 0    | 18   | 17.8 | 18   | 17.4 | 17.8 | 11   | 100 |
| 58 | H2 | 18   | 17.9 | 0    | 18   | 17.3 | 17.8 | 11   | 100 |
| 59 | H3 | 18   | 17.9 | 17.8 | 18   | 17.3 | 0    | 11   | 100 |
| 60 | H4 | 18   | 17.9 | 17.8 | 0    | 17.4 | 17.8 | 11   | 100 |
| 61 | H5 | 18   | 0    | 17.8 | 18   | 17.4 | 17.8 | 11   | 100 |
| 62 | H6 | 17.9 | 17.8 | 17.7 | 17.9 | 0    | 17.7 | 10.9 | 100 |
| 63 | H7 | 15   | 14.9 | 14.8 | 15   | 14.5 | 14.8 | 11   | 100 |
| 64 | H8 | 0    | 0    | 0    | 0    | 0    | 0    | 100  | 100 |



## Additional FT-IR images

(a) Before exposure to analyte

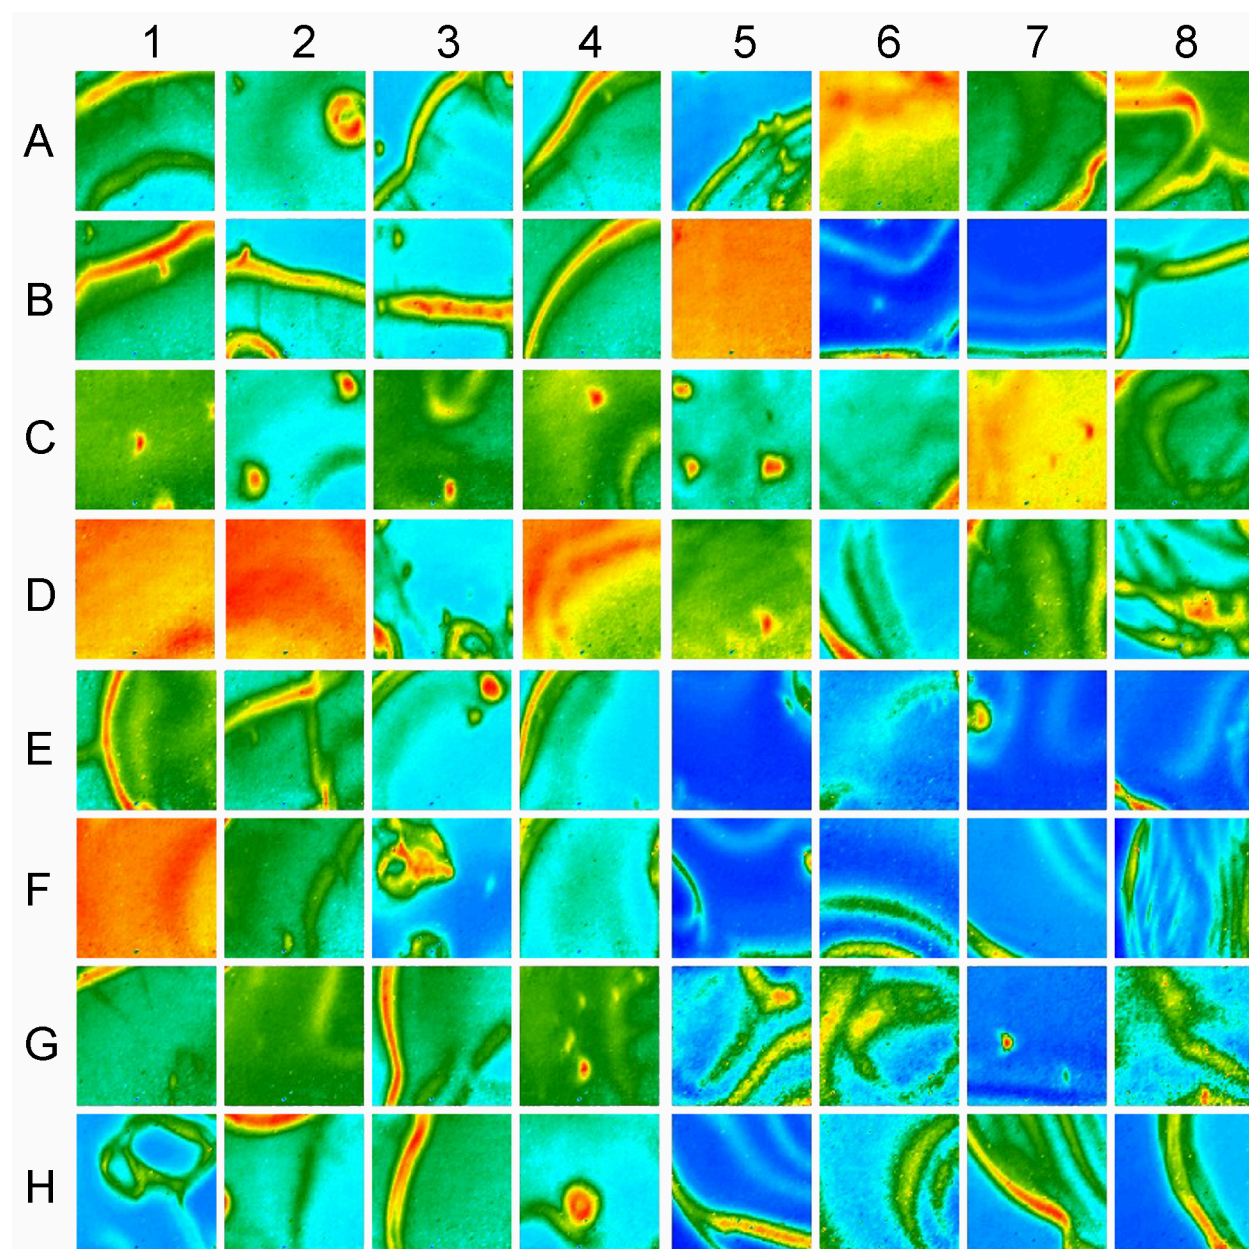

(b) After exposure to analyte

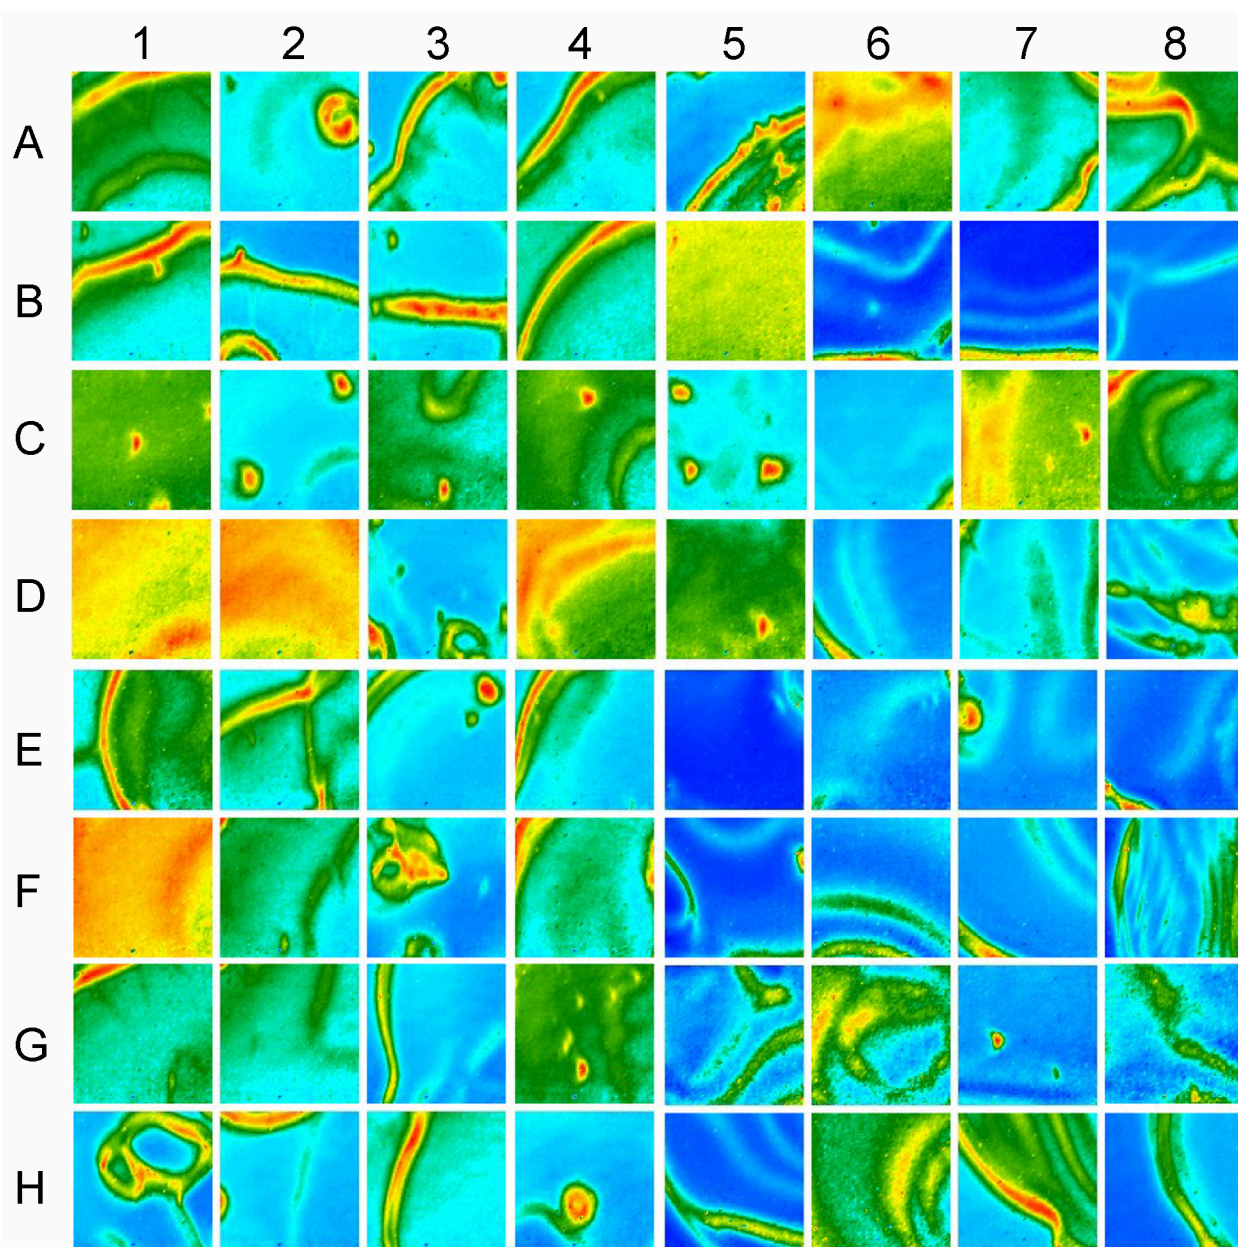

**Figure S2** Additional FTIR images for the polymer sensors before (a) and after (b) hexane vapor treatment; the band was set at  $3024\text{ cm}^{-1}$  (C-H stretching image). The dimension of each image is  $352 \times 352\text{ }\mu\text{m}^2$ .



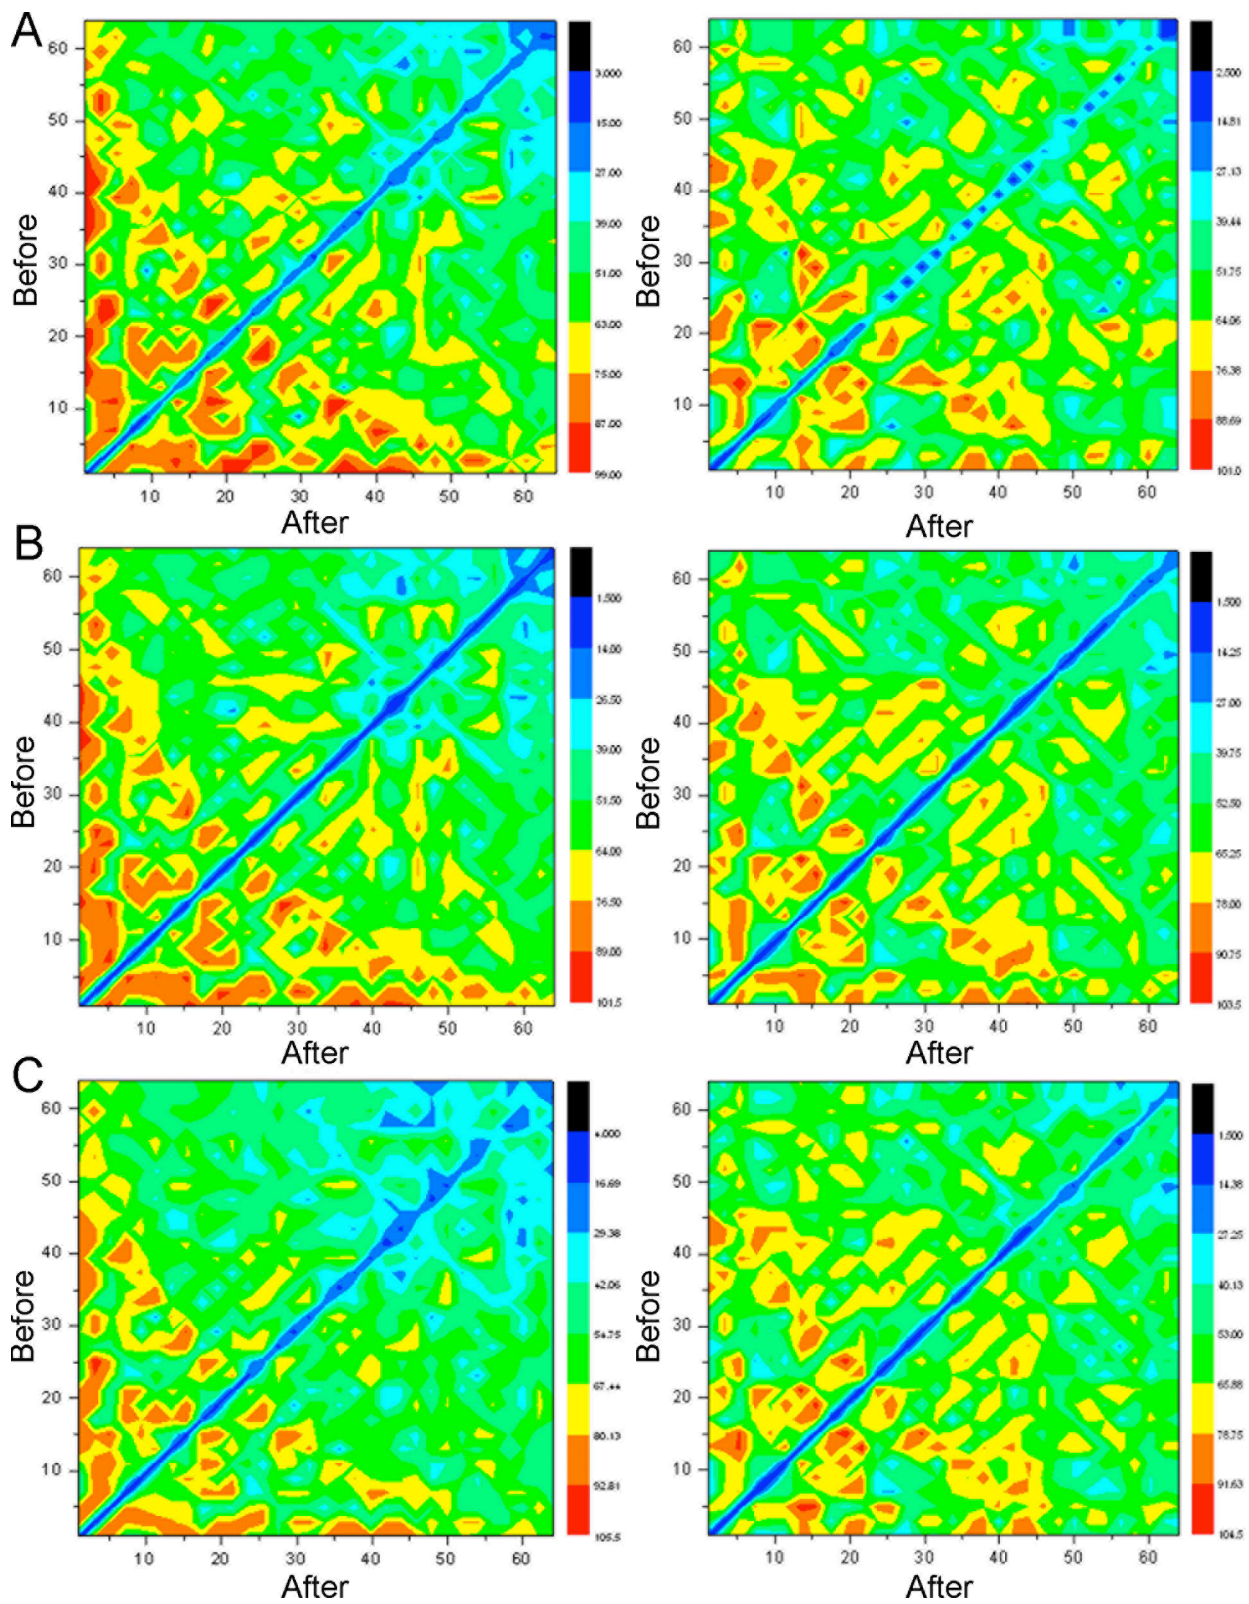

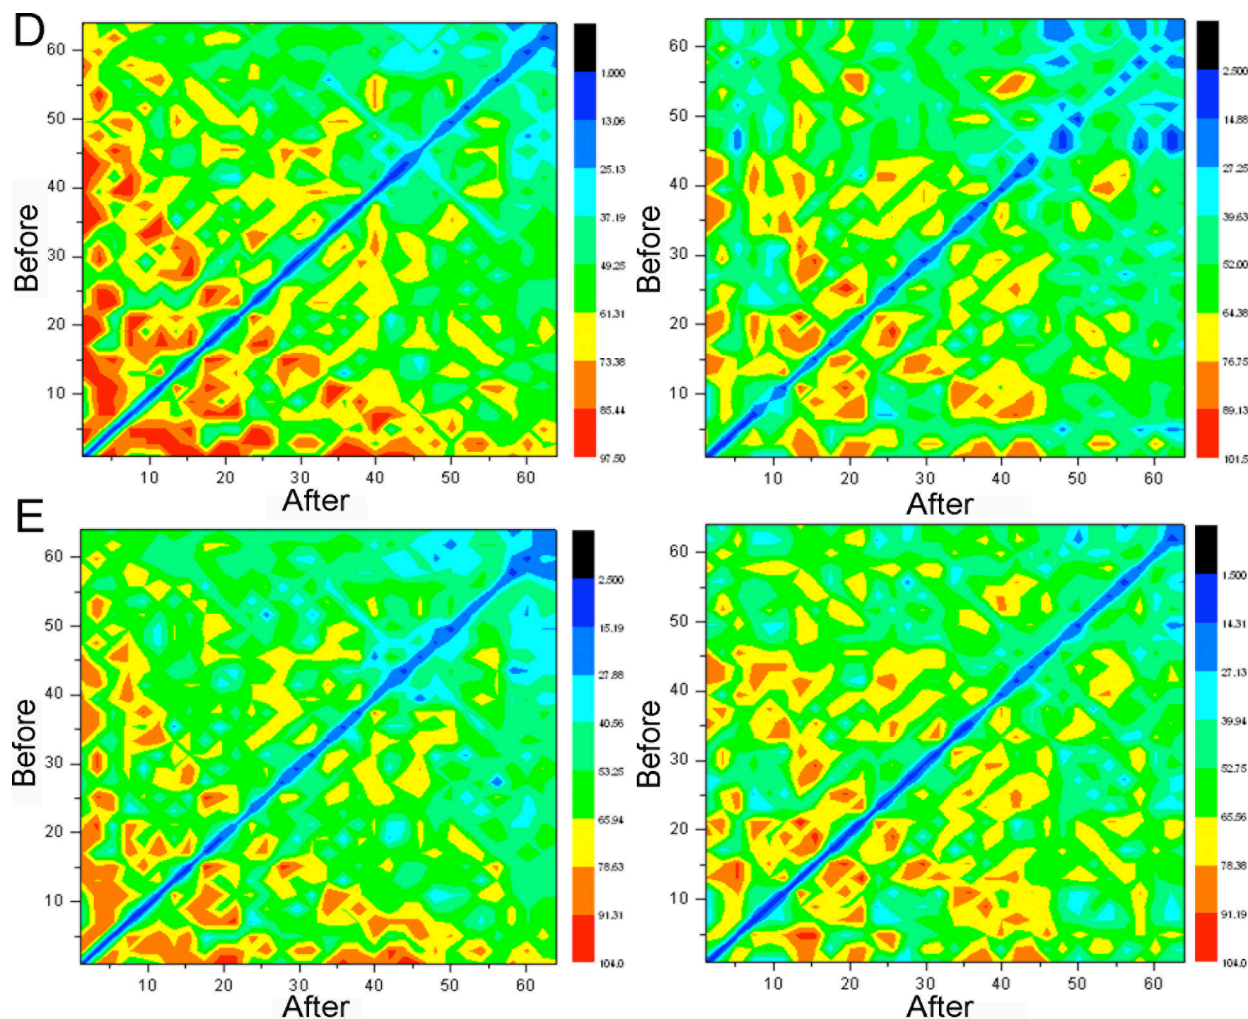

**Figure S3.** FTIR (left) and Raman (right) angle maps for the response (before versus after exposure to analyte vapor) of the polymer sensor arrays to various analytes (hexane (A); methylamine (B); acetonitrile (C); methanol (D); ethylacetate (E)). Theta maps can be used as an alternative way to characterize the vapors as  $\theta$  values of a polymer change upon exposure to an analyte. Notably, comparison of identical polymers (theta values along the diagonal) is diagnostic of the sensor array's response to the analyte: a blue continuous diagonal suggests no effect whereas a discontinuous diagonal suggests an interaction of the analyte with specific elements of the sensor array.
